# Supplementary material for: Synthesis of highly crystalline In2Ge2O7(En) hybrid sub-nanowires with ultraviolet photoluminescence emissions and their selective photocatalytic reduction of CO2 into renewable fuel
Source: Royal Society of Chemistry journal article supplement (doi:10.1039/c2ra20186k), 2012-01-01
Supplement: c2ra20186k.pdf [file c2ra20186k.pdf]

## Supporting Information

# Synthesis of Highly Crystalline $\text{In}_2\text{Ge}_2\text{O}_7(\text{En})$ Hybrid Sub-Nanowires with Ultraviolet Photoluminescence Emission and Selectively Photocatalytic Reduction of $\text{CO}_2$ into Renewable Fuel †

Qi Liu,<sup>a,c,f</sup> Yong Zhou,<sup>\*,a,b,d</sup> Yue Ma,<sup>e</sup> Zhigang Zou<sup>\*,a,b,c,d</sup>

<sup>a</sup> Eco-Materials and Renewable Energy Research Center (ERERC),  
Nanjing 210093, P. R. China. Fax: 86-25-83686632 ; Tel: 86-25-83686630  
E-mail: [zgzou@nju.edu.cn](mailto:zgzou@nju.edu.cn) (Z.G.Zou)

<sup>b</sup> Department of Physics and Department of Materials Science, Nanjing University,  
Nanjing 210093, P. R. China. Fax: 86-25-83686632 ; Tel: 86-25-83686630  
E-mail: [zhouyong1999@nju.edu.cn](mailto:zhouyong1999@nju.edu.cn) (Y.Zhou)

<sup>c</sup> Department of Materials Science and Engineering, Nanjing University.

<sup>d</sup> National Laboratory of Solid State Microstructures, Nanjing University.

<sup>e</sup> Kuang Yaming Honors School, Nanjing University.

<sup>f</sup> Anhui Polytechnic University.

## Experimental sections and characterizations

### Experimental sections

#### Preparation of the $\text{In}_2\text{Ge}_2\text{O}_7(\text{En})$ nanowires

All the chemicals were of analytical grade and used as received without further purification. The  $\text{In}_2\text{Ge}_2\text{O}_7(\text{En})$  NWs were synthesized using a solvothermal synthesis method. In a typical synthesis, 0.312g of  $\text{GeO}_2$  (3 mmol) and 0.584g of  $\text{In}(\text{CH}_3\text{COO})_3$  (2 mmol) were added to 15 mL of solvents which includes  $\text{H}_2\text{O}$  and ethylenediamine (En). The mixture was stirred for 40 min and then transferred to a stainless Teflon-lined autoclave of 25 mL inner volume. The solvothermal synthesis was performed under an auto-generated pressure at 180 °C for 24 h in an electric

oven, followed by cooling naturally to room temperature. The product was collected by centrifugation, washed thoroughly with deionized water and alcohol several times, and then dried at 60 °C for 12h. A white powder was finally obtained.

### **Loading the Pt Co-catalyst**

The loading of Pt was performed by a photocatalytic reduction method.  $\text{H}_2\text{PtCl}_6 \cdot 6\text{H}_2\text{O}$  was used for the source of Pt. Typically, 0.2 g photocatalyst, 40 mL distilled water, 15 mL  $\text{CH}_3\text{OH}$  and a given amount of  $\text{H}_2\text{PtCl}_6 \cdot 6\text{H}_2\text{O}$  were placed in a glass vessel. The reactant solution was irradiated by a 300W Xe arc lamp for 8 h with stirring. Then, the photocatalyst with Pt was filtered, washed thoroughly with deionized water and alcohol, dried at 60°C for 12h.

### **Characterization**

The crystal structures of the powder samples were investigated by an X-ray diffractometer (XRD) (Rigaku Ultima III, Japan) using Cu  $K\alpha$  radiation ( $\lambda = 0.154178$  nm) at 40 kV and 40 mA. The XRD patterns were obtained over the scanning range of  $10^\circ$ - $80^\circ$  at room temperature with a scan rate of  $10^\circ \text{ min}^{-1}$ . The morphology of the powders was examined by field emission scanning electron microscopy (FESEM, FEI NOVA NANOSEM 230). Transmission electron microscopy (TEM) images, high-resolution transmission electron microscopy (HRTEM) images were obtained on a JEOL JEM-2100 microscope with a  $\text{LaB}_6$  filament and an accelerating voltage of 200 kV. The element ratio was confirmed with ICP analysis (J-A1100, Jarrell-Ash, USA). DSC, DTA and TG was operated on TA2100/SDT2960, USA. The Brunauer-Emmett-Teller (BET) surface area was measured by nitrogen sorption at

77K on surface area and porosity analyzer (Micromeritics TriStar USA) and calculated by the BET method. The UV-vis diffuse reflectance spectrum was recorded with a UV-vis spectrophotometer (UV-2550, Shimadzu) at room temperature and transformed to the absorption spectrum according to the Kubelka–Munk relationship. FTIR spectra were measured with a Thermo Nexus 870 FTIR spectrometer (Thermo Nicolet USA).

### **Photocatalytic conversion of CO<sub>2</sub> into CO**

The photocatalytic reduction of CO<sub>2</sub> was carried out with 0.1 g of the powdered photocatalyst, which was uniformly placed at the bottom of a Pyrex glass cell. The reaction was in a gastight system. 0.4mL of didistilled water was injected into the system, which was filled with CO<sub>2</sub> to generate a water vapour. After adsorption of CO<sub>2</sub> had reached equilibrium in the dark, light photoirradiation was performed using a 300 W Xe arc lamp. A gas pump was used to accelerate gas diffusion. The concentration of product in the tube was withdrawn with a gas-tight syringe and detected by gas chromatograph (Shimadzu, GC-14B and GC8A with FID detector, Japan). The quantification of CO yield was based on the external standard and the use of calibration curve.

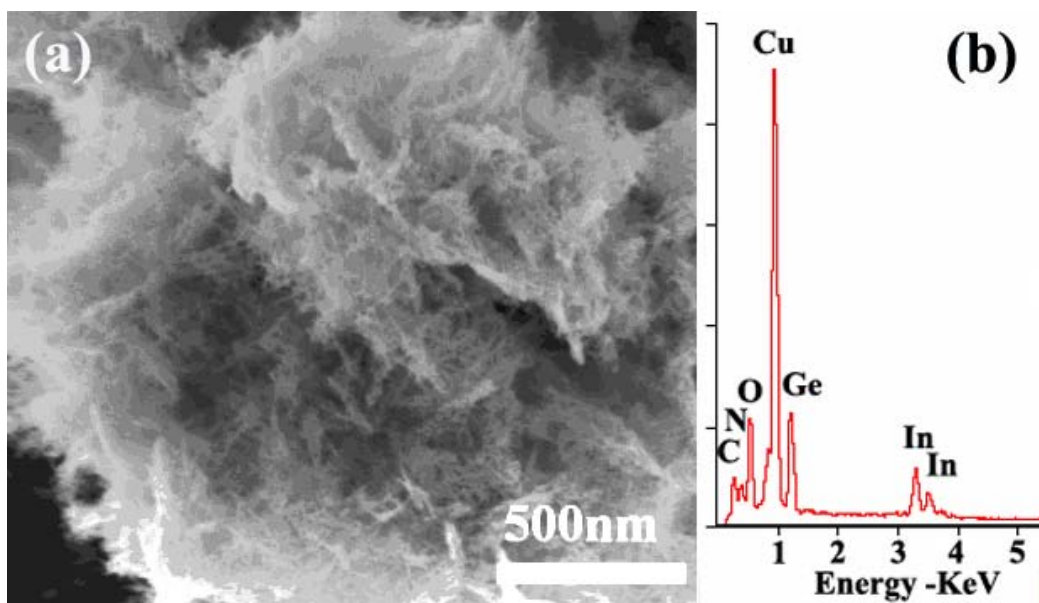

**Figure S1.** (a) FE-SEM image of the  $\text{In}_2\text{Ge}_2\text{O}_7(\text{En})$  ultrathin nanowire and (b) corresponding EDX analysis.

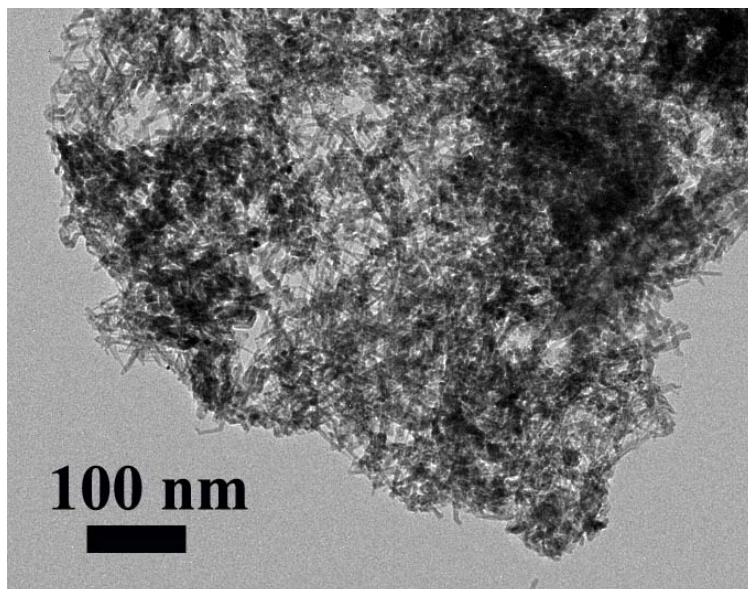

**Figure S2.** Low-magnification TEM image, demonstrating high-yield production of the ultrathin nanowire.

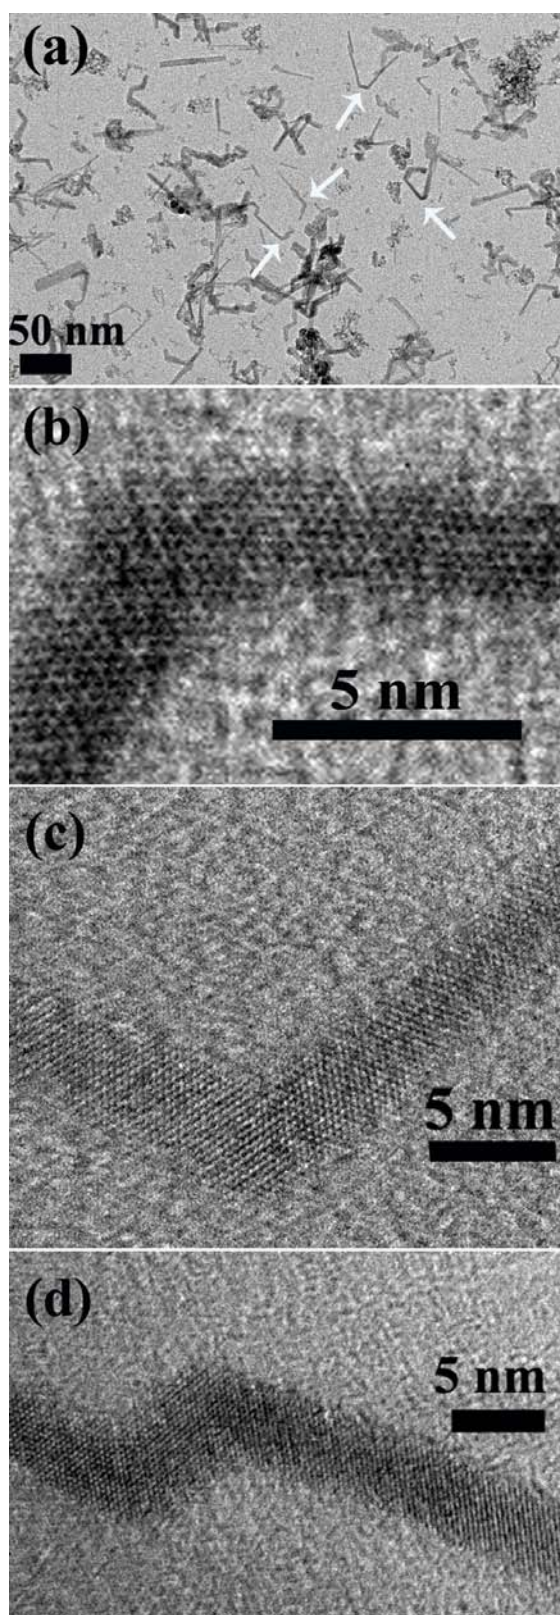

**Figure S3.** TEM and HRTEM of the ultrathin nanowires with V- and Z-shaped structures. The arrows in (a) mark typical nonlinear nanowires.

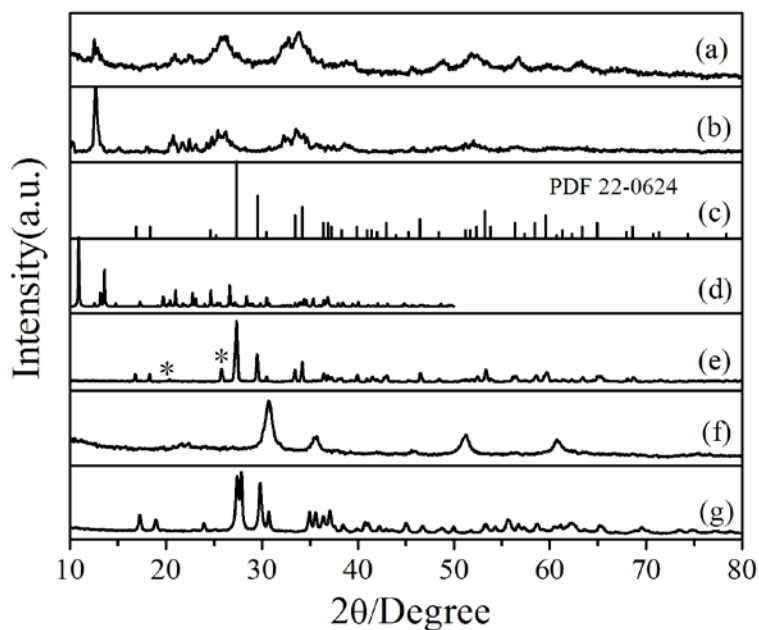

**Figure S4.** XRD patterns: (a) ultrathin nanowires. (b) the powder obtained with the synthetic time prolonged to 3 days. (c) In<sub>2</sub>Ge<sub>2</sub>O<sub>7</sub> Powder Diffraction Standards (JCPDS)-International Centre for Diffraction Data (ICDD). (d) In<sub>2</sub>Ge<sub>6</sub>O<sub>15</sub>(en)<sub>2</sub> cited from Ref. [12b]. (e) product obtained by calcinations of the ultrathin nanowires at 1000 °C. \* marked the diffraction peaks of GeO<sub>2</sub>. (f) In<sub>2</sub>O<sub>3</sub> obtained with pure En as solvent. (g) In<sub>2</sub>Ge<sub>2</sub>O<sub>7</sub> obtained with pure water as solvent.

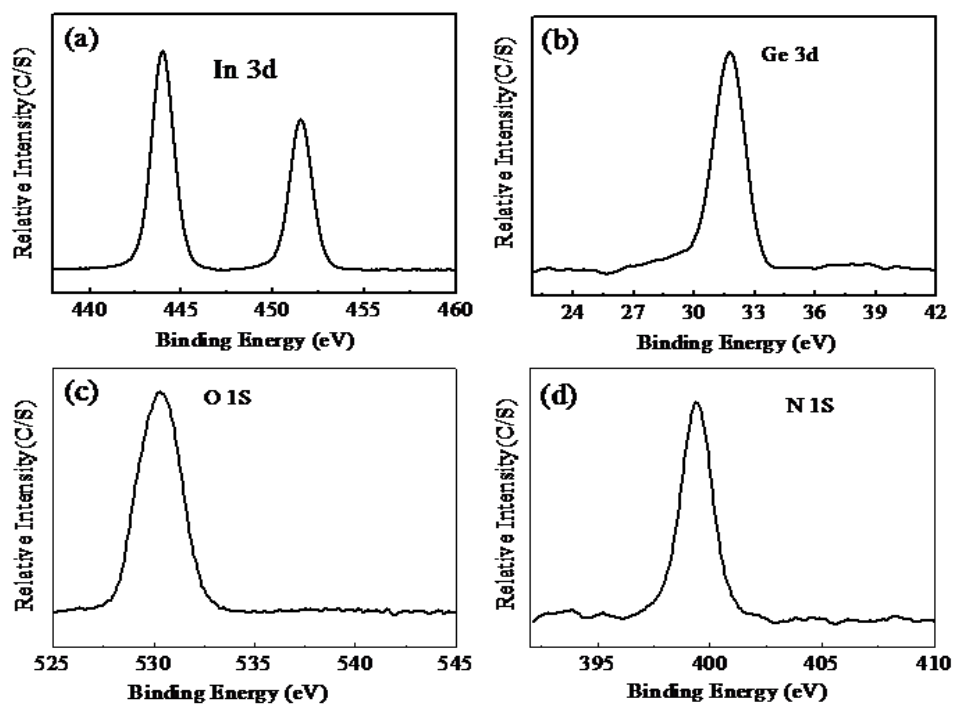

**Figure S5.** XPS spectra of the ultrathin nanowire.



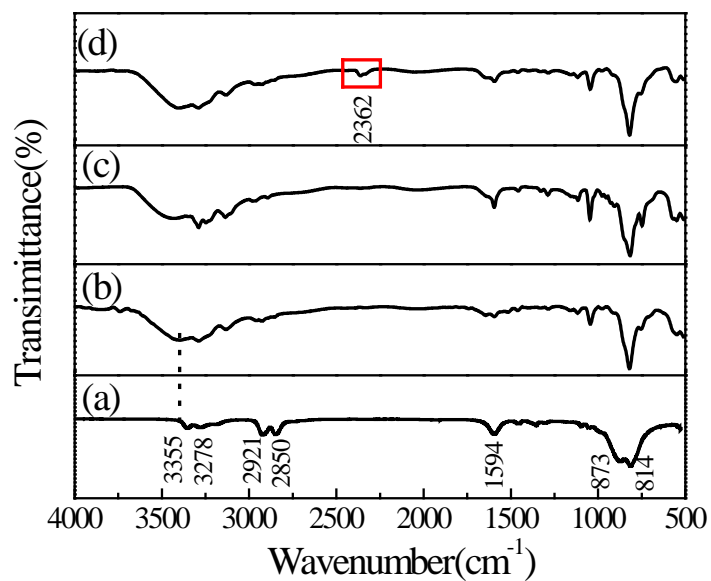

**Figure S6.** FT-IR spectra of (a) pure En, (b) In<sub>2</sub>Ge<sub>2</sub>O<sub>7</sub> (En) ultrathin nanowires, (c) In<sub>2</sub>Ge<sub>2</sub>O<sub>7</sub>(En) ultrathin nanowire after photocatalysis reaction.(d) In<sub>2</sub>Ge<sub>2</sub>O<sub>7</sub>(En) ultrathin nanowire after adsorption of CO<sub>2</sub>. The band at 2362 cm<sup>-1</sup> in (d) is assigned to asymmetric stretch of CO<sub>2</sub>.

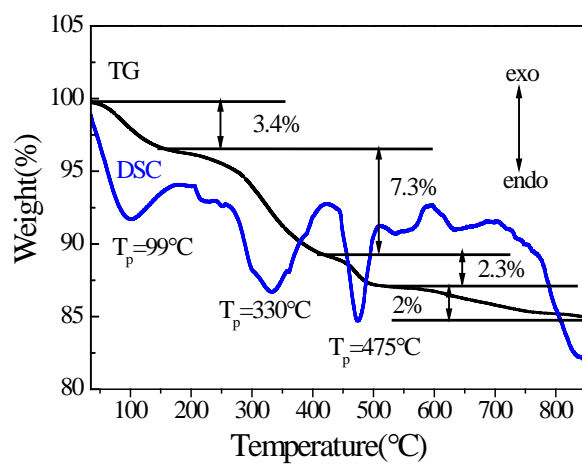

**Figure S7.** DTA (blue curve) and TG (black curve) analysis of the nanowire.

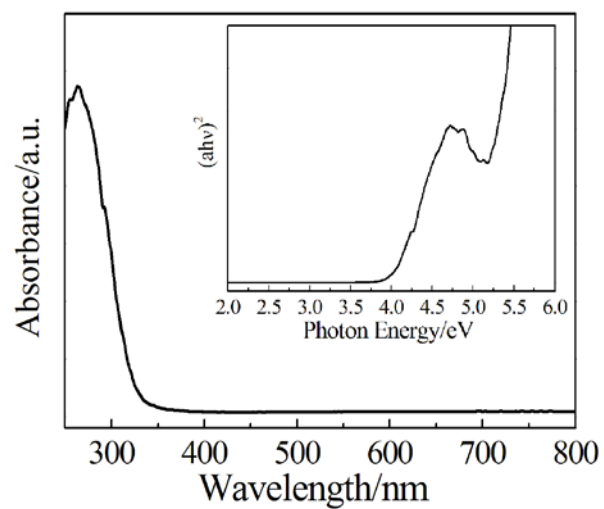

**Figure S8.** UV-vis adsorption spectrum of the ultrathin nanowires.

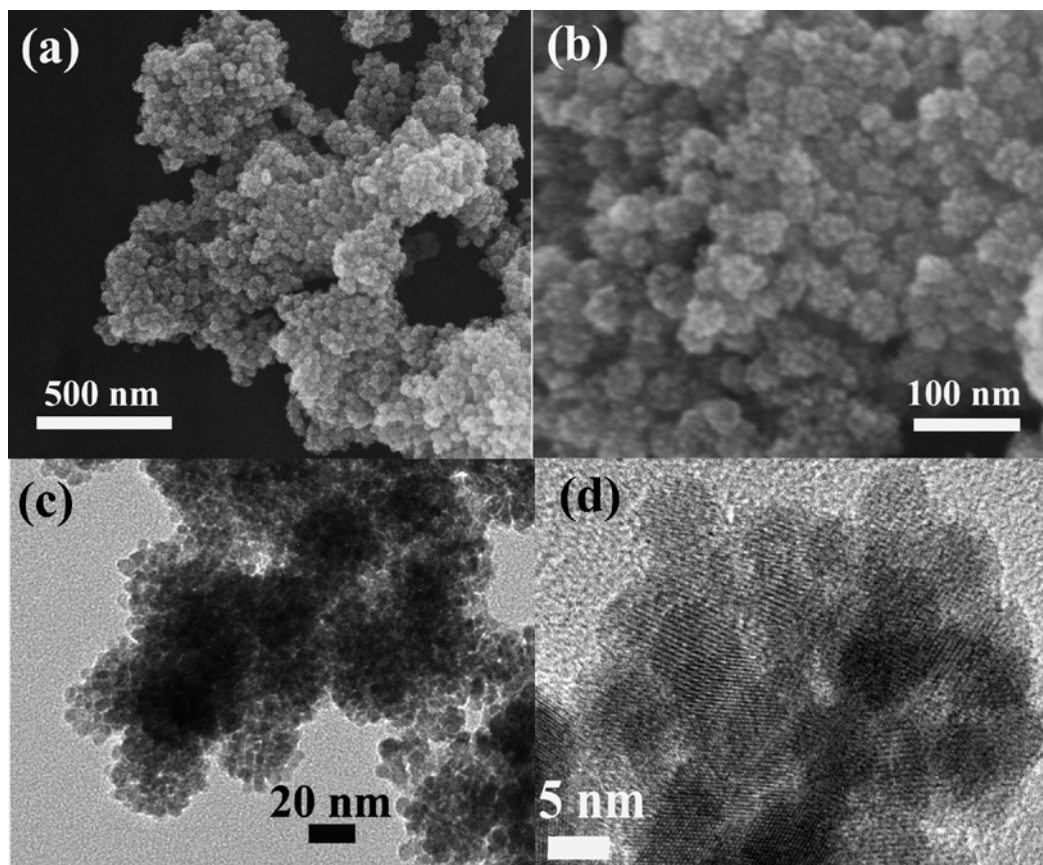

**Figure S9.** (a) and (b) FE-SEM images, (c) TEM and (d) HRTEM images of the  $\text{In}_2\text{O}_3$  beads consisting of tiny nanocrystals formed with pure En as solvent.

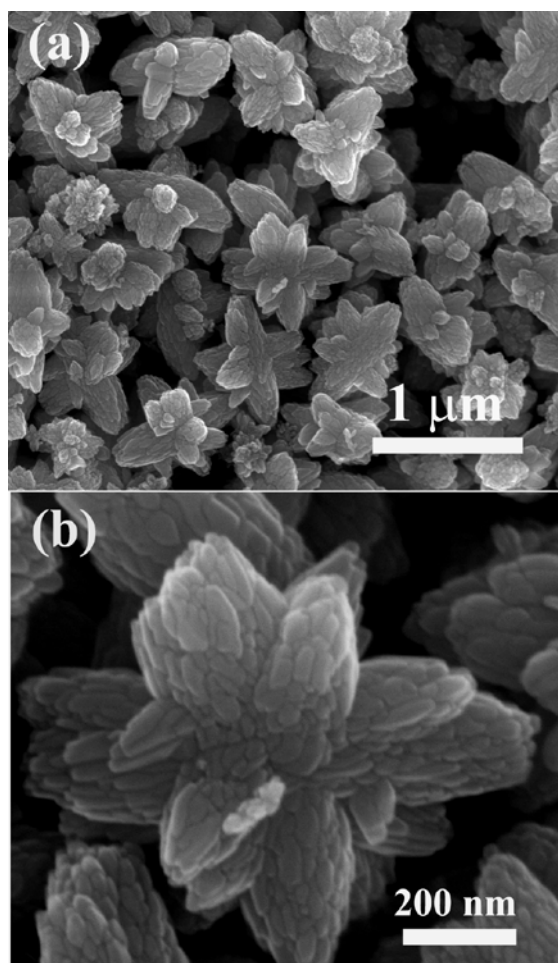

**Figure S10.** FE-SEM image of  $\text{In}_2\text{Ge}_2\text{O}_7$  nanorod aggregates formed with pure  $\text{H}_2\text{O}$  as solvent.
